# Supplementary material
Source: PubMed Central journal article supplement (PMC4987794)
Supplement: pnas.1602728113.sapp.pdf [file pnas.1602728113.sapp.pdf]

## Supplementary Information

### The transcription factors of the alternative NF- $\kappa$ B pathway are required for germinal center B-cell development

Nilushi S. De Silva, Michael M. Anderson, Amanda Carette, Kathryn Silva, Nicole Heise, Govind Bhagat, and Ulf Klein

**Figure S1.** Mature GCs are not maintained following combined GC B cell-specific deletion of *relb* and *nfkb2*.

**Figure S2.** Identification of genes controlled by the alternative NF- $\kappa$ B subunits RELB and NF- $\kappa$ B2 in GC B-cells.

**Figure S3.** Analysis for BrdU incorporation in GC B cells of *relb/nfkb2*-deleted mice.

**Figure S4.** GSEA to identify gene signatures that were enriched in GC B cells from Cy1-Cre vs. *relb<sup>fl/fl</sup>nfkb2<sup>fl/fl</sup>*Cy1-Cre mice.

**Figure S5.** Reduced PC frequencies following GC B-cell-specific deletion of the alternative NF- $\kappa$ B subunits RELB and NF- $\kappa$ B2 in GC B-cells.

**Figure S6.** GC B cell-specific deletion of *nfkb2* does not impair the GC reaction.

**Figure S7.** Normal splenic plasma cell frequencies following GC B cell-specific deletion of *nfkb2* at day 14 postimmunization.

**Figure S8.** Normal splenic and bone marrow plasma cell frequencies following GC B cell-specific deletion of *nfkb2* at day 28 postimmunization.

**Table S1.** Antibodies used in experiments.

**Dataset 1.** Differentially expressed sequence analysis (DE-SEQ) of RELB/NF- $\kappa$ B2-proficient vs. RELB/NF- $\kappa$ B2-deficient GC B-cells at d7 of the GC-reaction: Reduced expression in *relb/nfkb2*-deleted GC B-cells.

**Dataset 2.** Differentially expressed sequence analysis (DE-SEQ) of RELB/NF- $\kappa$ B2-proficient vs. RELB/NF- $\kappa$ B2-deficient GC-B cells at d7 of the GC-reaction: Increased expression in *relb/nfkb2*-deleted GC B-cells.

**Dataset 3.** GSEA was used to identify gene signatures that were enriched in GC B cells from Cy1-Cre vs. *relb<sup>fl/fl</sup>nfkb2<sup>fl/fl</sup>*Cy1-Cre mice.

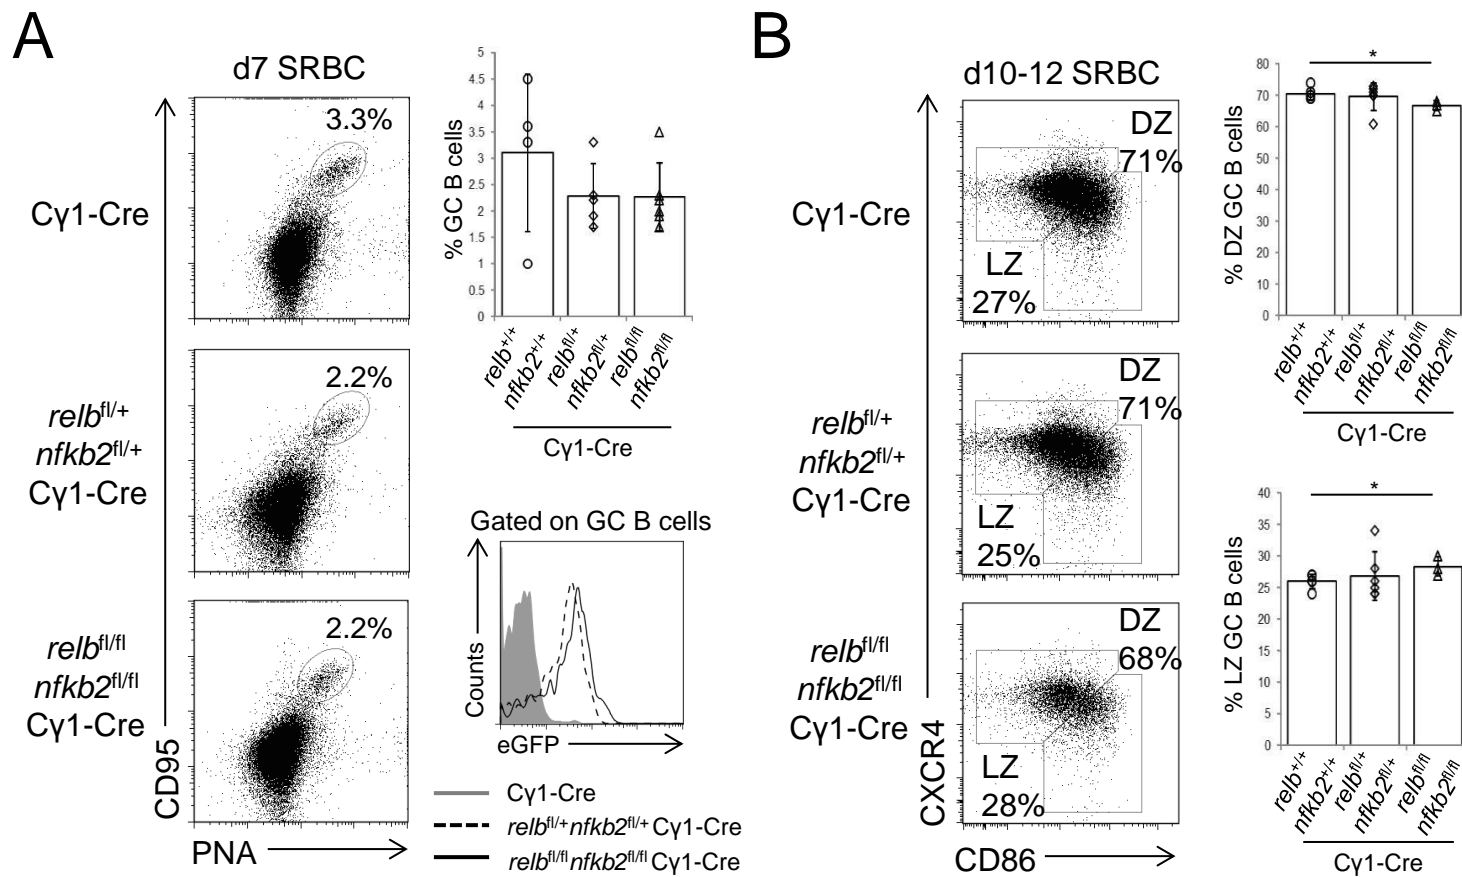

Fig. S1

**A**

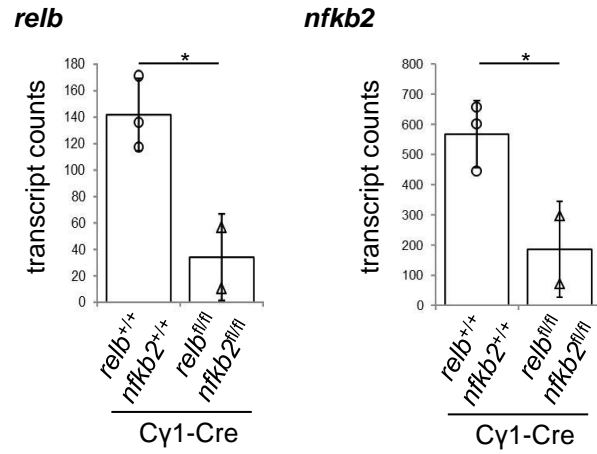

**B**

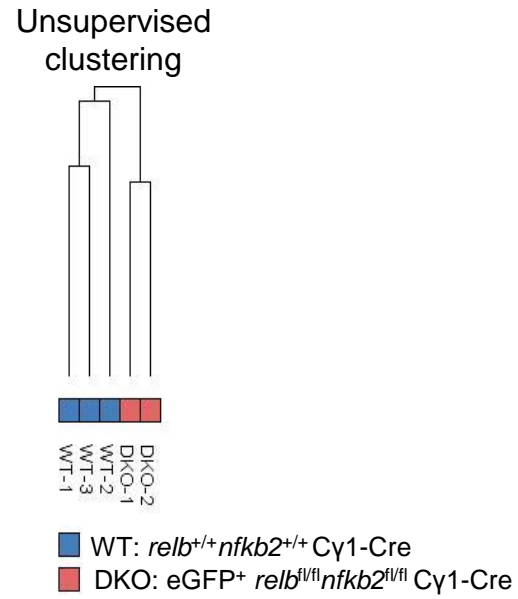

**C**

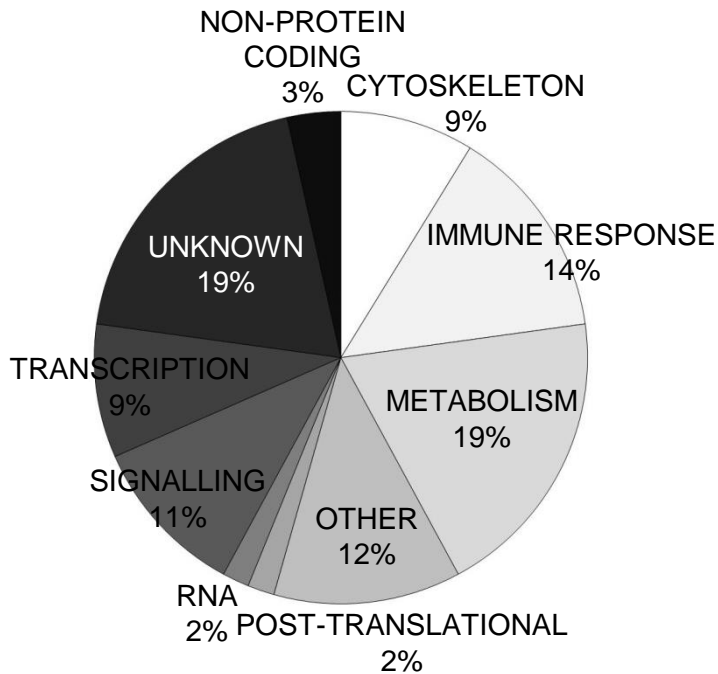

**D**

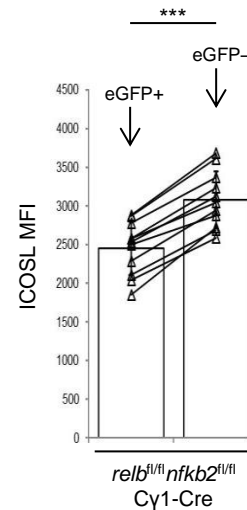

Fig. S2

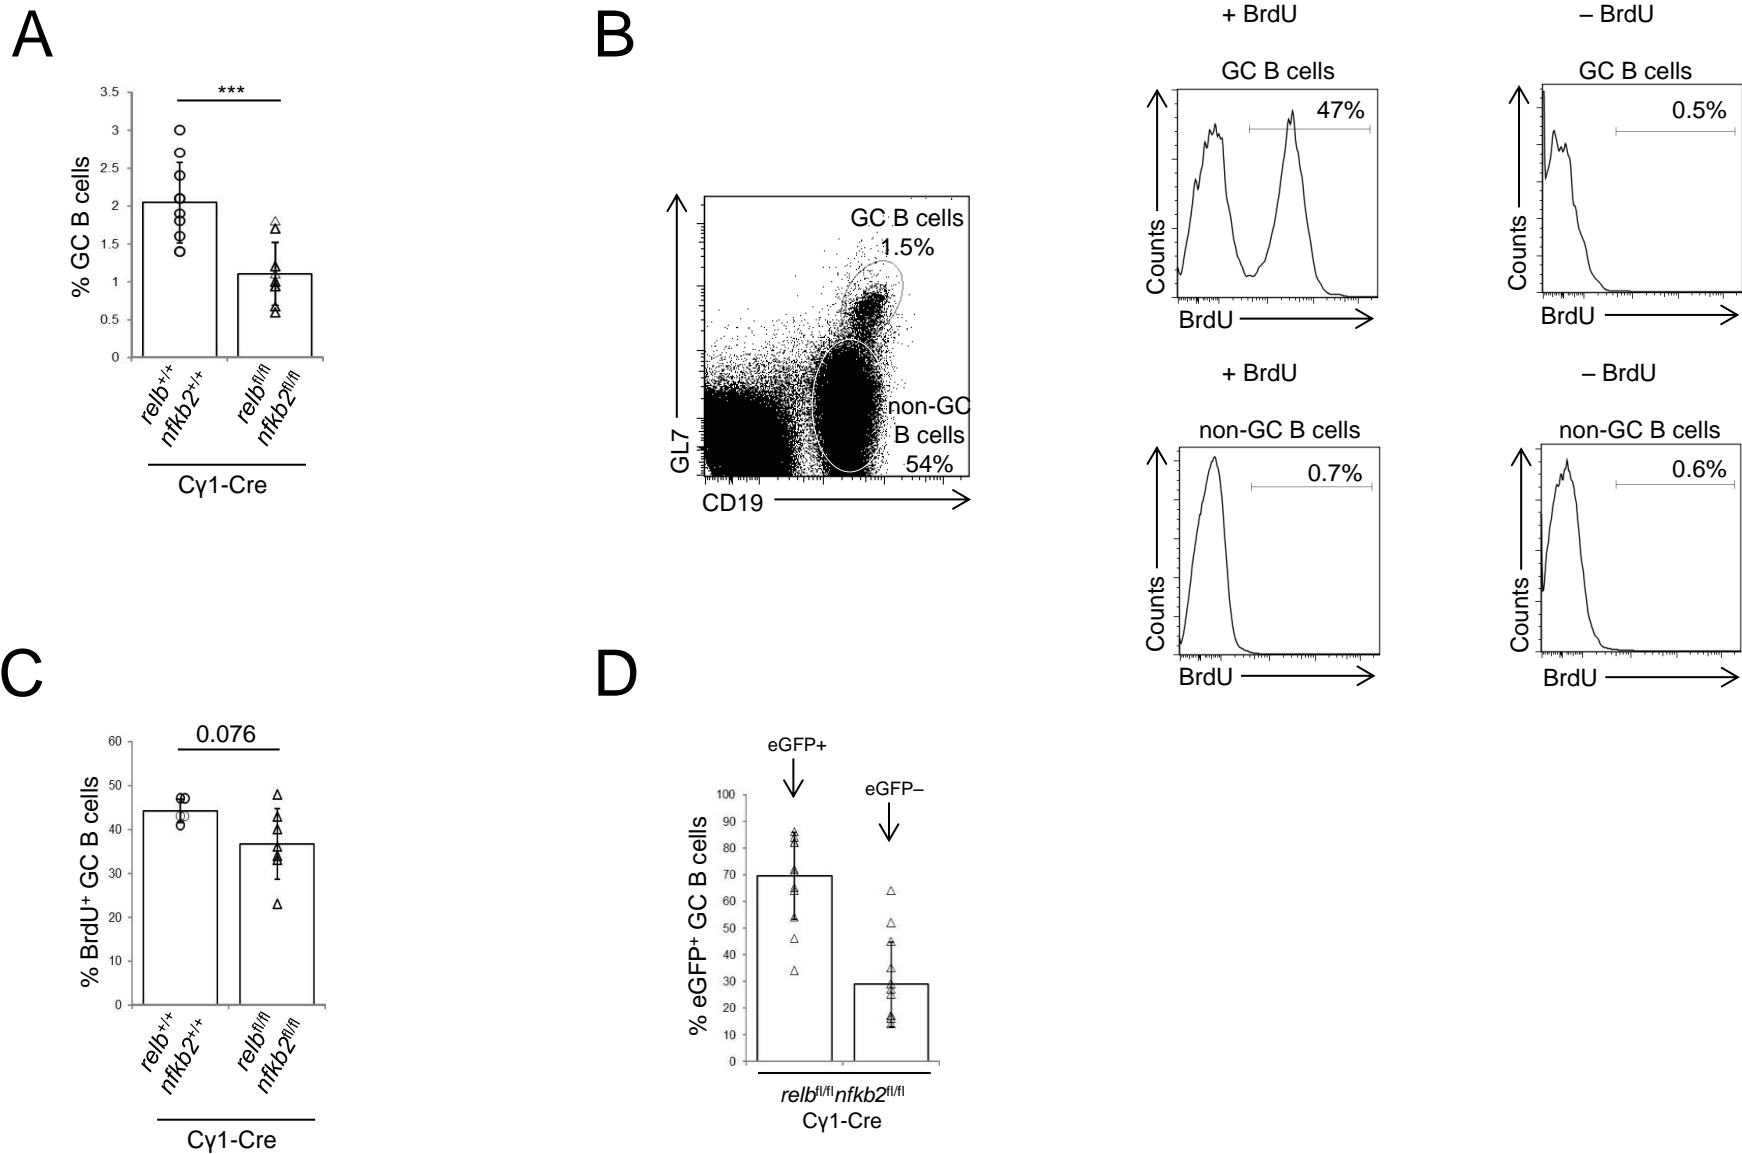

Fig. S3

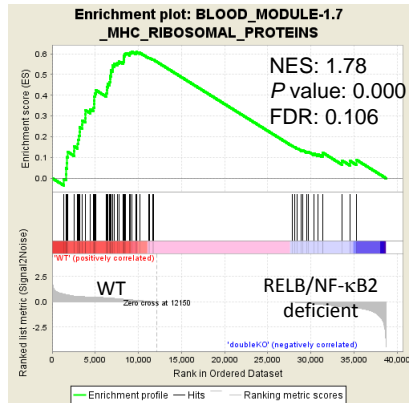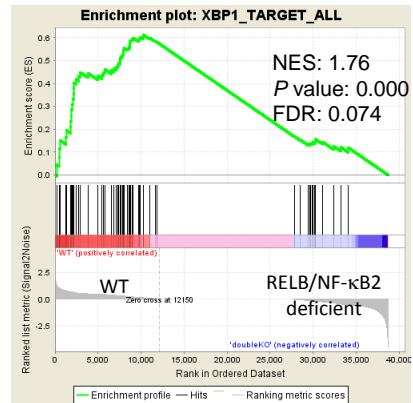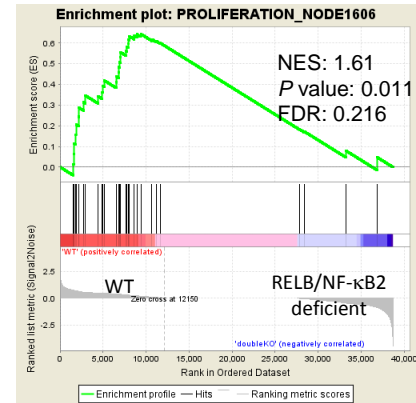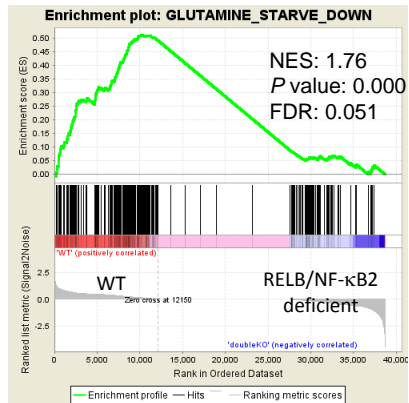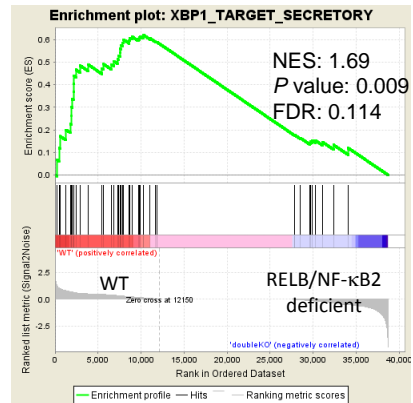

Fig. S4

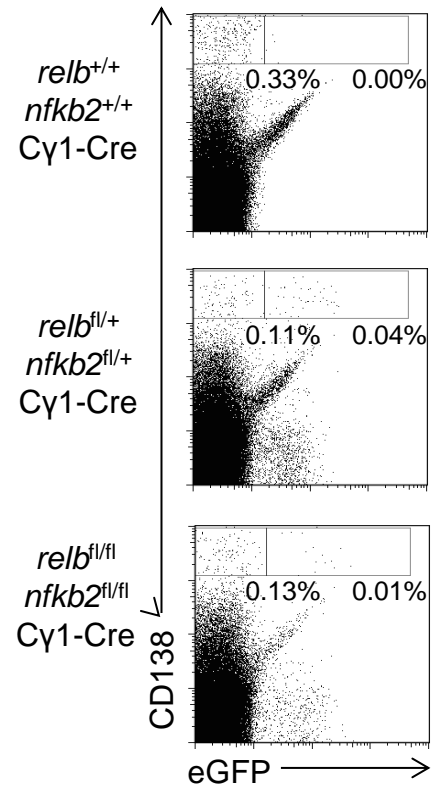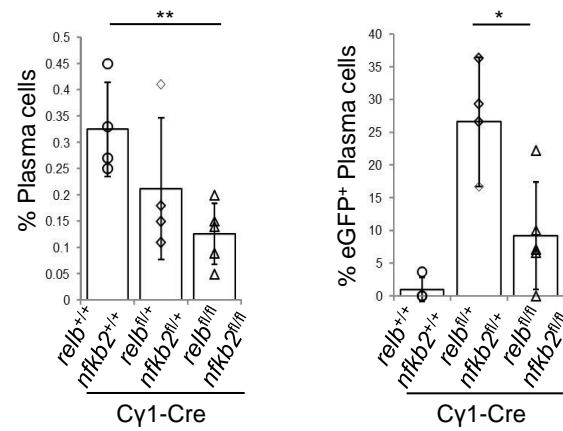

Fig. S5

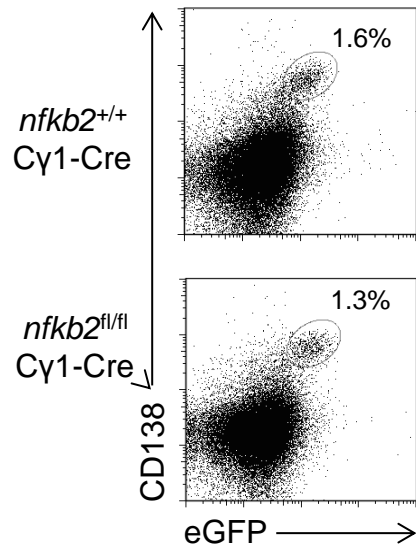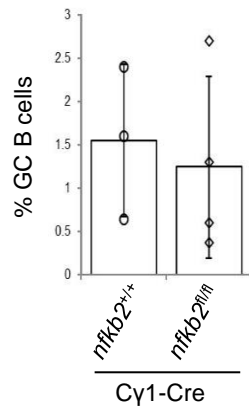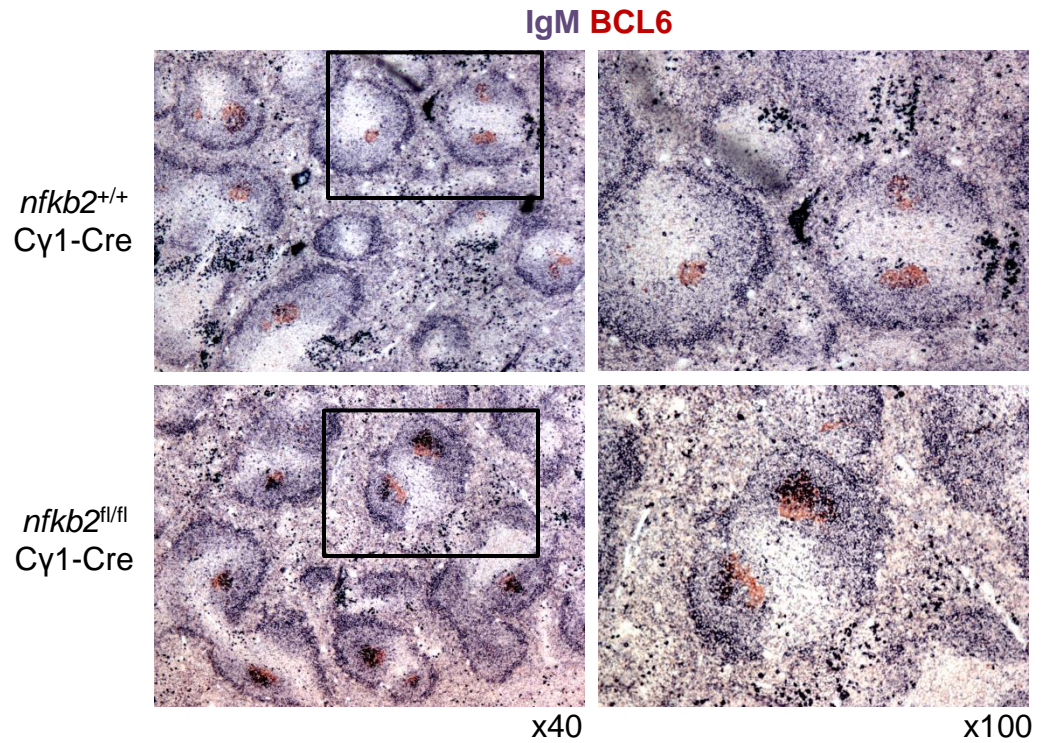

Fig. S6

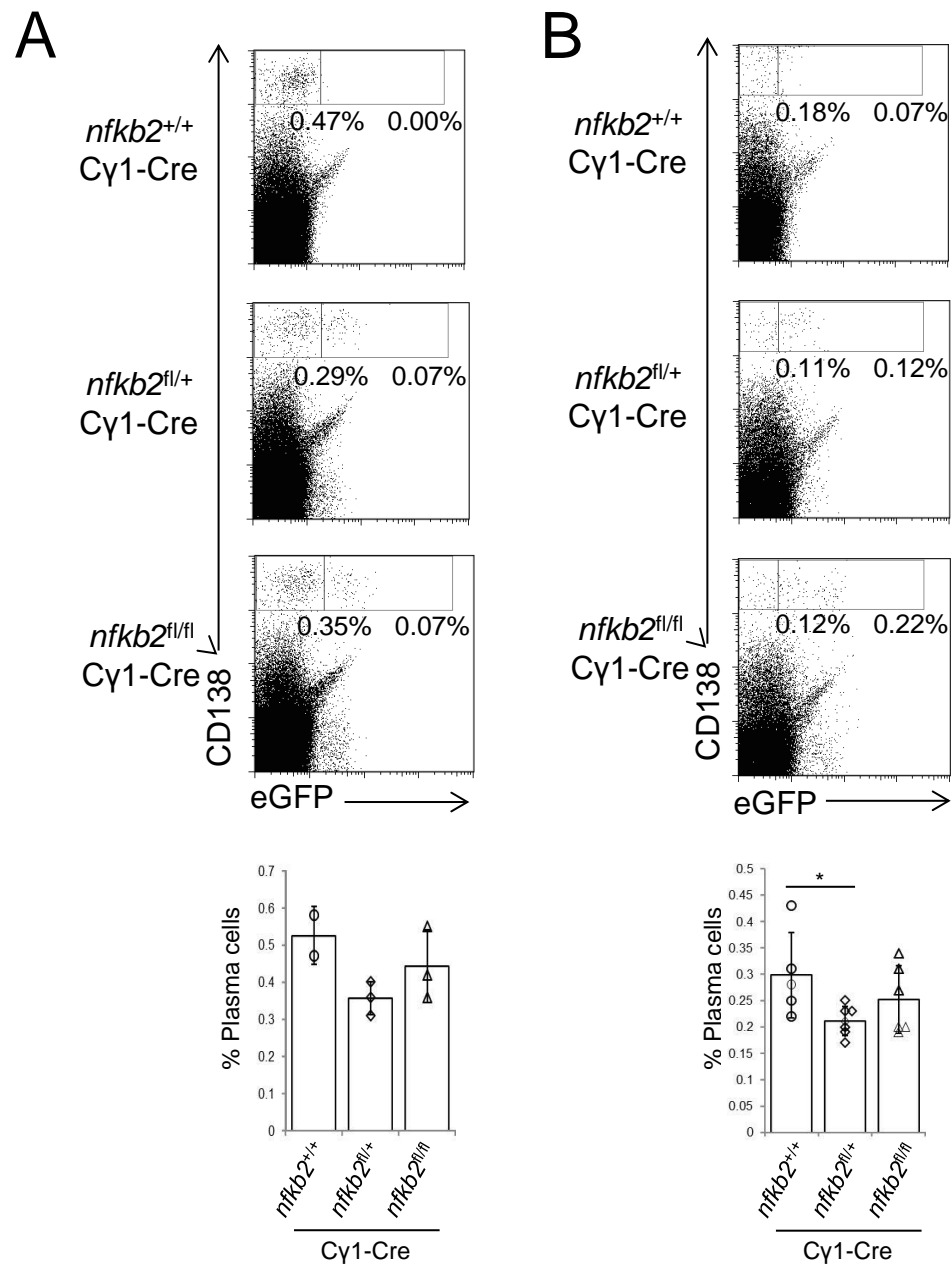

Fig. S7



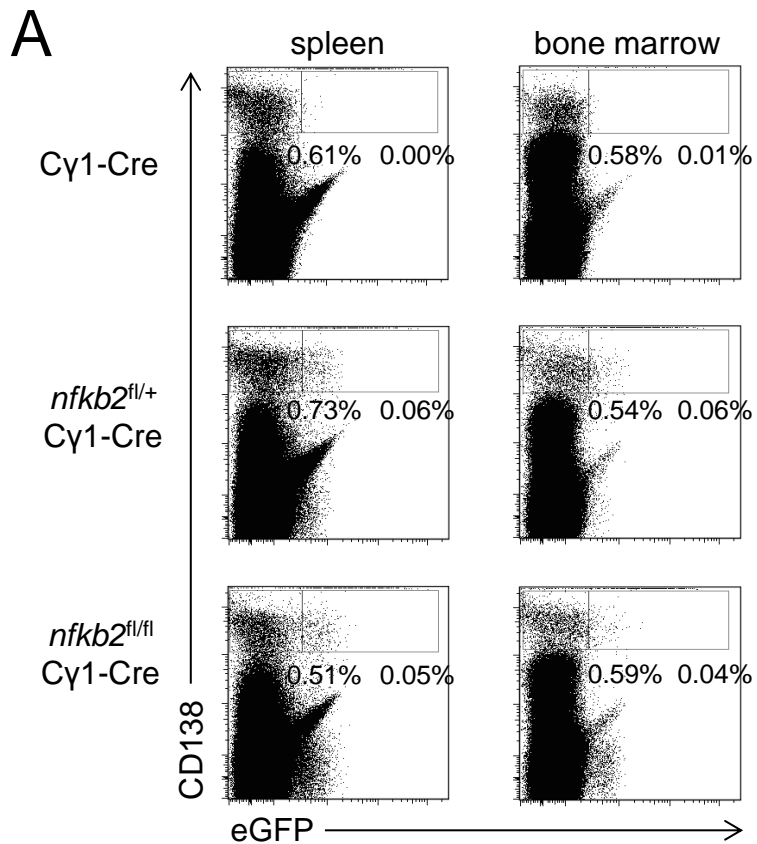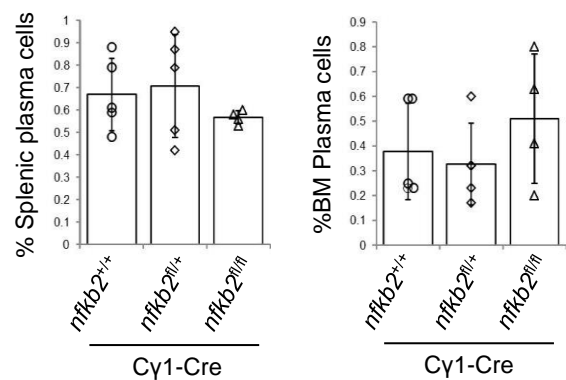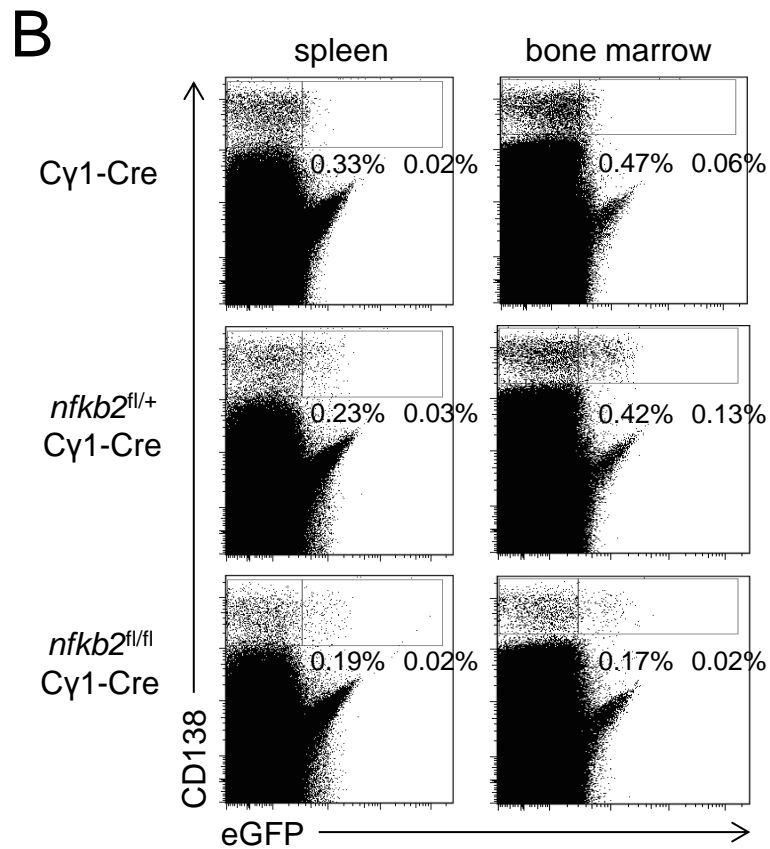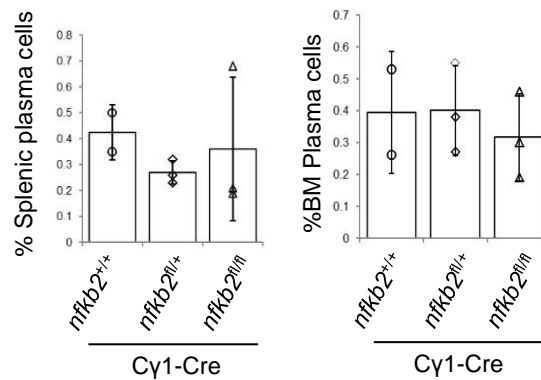

Fig. S8

**Figure S1. Mature GCs are not maintained following combined GC B cell-specific deletion of *relb* and *nfkb2*.** (A) *relb<sup>fl/fl</sup>nfkb2<sup>fl/fl</sup>*Cy1-Cre mice and the corresponding heterozygous and Cy1-Cre control mice were analyzed via flow cytometry 7d following immunization with SRBCs for splenic GC B cells. Summary of the frequencies of GC B cells (top right). Each symbol represents a mouse. Expression of eGFP in GC B cells from mice of the indicated genotypes (bottom right). (B) *relb<sup>fl/fl</sup>nfkb2<sup>fl/fl</sup>*Cy1-Cre mice and the corresponding heterozygous and Cy1-Cre control mice were analyzed via flow cytometry 10-12d following immunization with SRBCs for CD38<sup>lo</sup>CD95<sup>hi</sup>CXCR4<sup>hi</sup>CD86<sup>lo</sup> DZ B cells and CD38<sup>lo</sup>CD95<sup>hi</sup>CXCR4<sup>lo</sup>CD86<sup>hi</sup> LZ B cells (left). Summary of frequencies of DZ and LZ B cells (right). Each symbol represents a mouse. Statistical significance was determined by Student's *t* test (\*, *P*<0.05). Data are shown as mean ± SD.

**Figure S2. Identification of genes controlled by the alternative NF-κB subunits RELB and NF-κB2 in GC B-cells.** (A) eGFP<sup>+</sup> GC B-cells from *relb<sup>fl/fl</sup>nfkb2<sup>fl/fl</sup>*Cy1-Cre mice and GC B-cells from Cy1-Cre control mice 7d following immunization with SRBCs were purified via flow cytometric sorting and RNA was subjected to RNA-sequencing (RNA-seq). The mRNA expression of RELB and NF-κB2 is presented as total transcript counts for each gene. Each symbol represents a mouse. Data are shown as mean ± standard deviation. Statistical significance was determined by Student's *t* test (\*, *P*<0.05). eGFP<sup>+</sup> identifies *relb/nfkb2*-deleted GC B-cells from *relb<sup>fl/fl</sup>nfkb2<sup>fl/fl</sup>*Cy1-Cre mice. (B) Unsupervised clustering analysis of transcript counts obtained from RNA-seq of RNA isolated via flow cytometry from eGFP<sup>+</sup> GC B-cells from *relb<sup>fl/fl</sup>nfkb2<sup>fl/fl</sup>*Cy1-Cre mice (red) and GC B-cells from Cy1-Cre control mice (blue). (C) Differentially expressed sequence analysis (DESeq) of RNA from eGFP<sup>+</sup> GC B-cells from *relb<sup>fl/fl</sup>nfkb2<sup>fl/fl</sup>*Cy1-Cre mice and GC B-cells from Cy1-Cre control mice identified 59 transcripts with less than 2.5-fold increased expression in the combined absence of RELB and NF-κB2 at a significant threshold of *p*<0.01. Genes were assigned to putative functional categories. For the

identity of the corresponding genes, fold-change and  $p$  values, see Table S1. eGFP<sup>+</sup> identifies *relb/nfkb2*-deleted GC B-cells from *relb<sup>fl/fl</sup>nfkb2<sup>fl/fl</sup>*C $\gamma$ 1-Cre mice. (D) *relb<sup>fl/fl</sup>nfkb2<sup>fl/fl</sup>*C $\gamma$ 1-Cre mice were analyzed via flow cytometry 10d following immunization with SRBCs for the expression of ICOSL on CD95<sup>hi</sup>CD38<sup>lo</sup> GC B-cells. Summary of the corresponding MFI in eGFP<sup>+</sup> and eGFP<sup>-</sup> GC B-cells.

**Fig. S3. Analysis for BrdU incorporation in GC B cells of *relb/nfkb2*-deleted mice.** (A) Fraction of GC B cells in *relb<sup>fl/fl</sup>nfkb2<sup>fl/fl</sup>*C $\gamma$ 1-Cre and C $\gamma$ 1-Cre mice at day 10 postimmunization with SRBCs. (B, left) CD19<sup>+</sup>GL7<sup>hi</sup> gating strategy to identify GC B cells using a single GC B-cell marker (GL7) as described previously<sup>1</sup>. (B, right) Examples of BrdU incorporation in GC B cells and non-GC B cells in mice that received BrdU (+BrdU) and mice that did not (-BrdU). (C) Summary of fraction of GC B cells incorporating BrdU in *relb<sup>fl/fl</sup>nfkb2<sup>fl/fl</sup>*C $\gamma$ 1-Cre and C $\gamma$ 1-Cre mice at day 10 postimmunization with SRBCs. (D) Fraction of eGFP<sup>+</sup> and eGFP<sup>-</sup> GC B cells in *relb<sup>fl/fl</sup>nfkb2<sup>fl/fl</sup>*C $\gamma$ 1-Cre mice at day 10 postimmunization with SRBCs. (A,C,D) Each symbol represents a mouse. Data are shown as mean  $\pm$  standard deviation. Statistical significance was determined by Student's  $t$  test (\*\*\*,  $P < 0.001$ ).

**Figure S4. GSEA to identify gene signatures that were enriched in GC B-cells from C $\gamma$ 1-Cre vs. *relb<sup>fl/fl</sup>nfkb2<sup>fl/fl</sup>*C $\gamma$ 1-Cre mice.** Comparison of RNA-seq data from eGFP<sup>+</sup> GC B-cells from *relb<sup>fl/fl</sup>nfkb2<sup>fl/fl</sup>*C $\gamma$ 1-Cre mice and GC B-cells from C $\gamma$ 1-Cre control mice 7d following immunization with SRBCs with a library of normal and pathological lymphoid gene expression signatures identified five signatures enriched in RELB/NF- $\kappa$ B2-proficient vs. deficient GC B-cells.

**Figure S5. Reduced PC frequencies following GC B-cell-specific deletion of the alternative NF- $\kappa$ B subunits RELB and NF- $\kappa$ B2 in GC B-cells.** (top) *relb<sup>fl/fl</sup>nfkb2<sup>fl/fl</sup>*C $\gamma$ 1-Cre mice and the corresponding heterozygous and C $\gamma$ 1-Cre control mice were analyzed via flow

cytometry 14d following immunization with sheep red blood cells (SRBCs) for CD138 and eGFP expression of splenocytes. Numbers beside each gate denote the fractions of CD138<sup>hi</sup> splenic plasma cells (PCs) in mice of the indicated genotypes. (bottom) Summary of the frequencies of PCs. Each symbol represents a mouse. Data are shown as mean  $\pm$  standard deviation. Statistical significance was determined by Student's *t* test (\*,  $P < 0.05$ ; \*\*,  $P < 0.01$ ). eGFP identifies *relb/nfkb2*-deleted PCs within the indicated genotypes.

**Figure S6. GC B cell-specific deletion of *nfkb2* does not impair the GC reaction.** (A) *nfkb2*<sup>fl/fl</sup>Cy1-Cre mice and Cy1-Cre control mice were analyzed by flow cytometry 14d following immunization with NP-KLH for CD95<sup>hi</sup>PNA<sup>hi</sup> splenic GC B cells. Summary of the frequencies of GC B cells (bottom). Each symbol represents a mouse. Data are shown as mean  $\pm$  standard deviation (SD). (B) Spleen sections from the indicated genotypes were analyzed for the expression of BCL6 and IgM via IHC.

**Figure S7. Normal splenic plasma cell frequencies following GC B cell-specific deletion of *nfkb2* at day 14 postimmunization.** *nfkb2*<sup>fl/fl</sup>Cy1-Cre mice and the corresponding heterozygous and Cy1-Cre control mice were analyzed via flow cytometry 14 days following immunization with (A) NP-KLH and (B) sheep red blood cells (SRBCs) for CD138 and eGFP expression of splenocytes. Numbers beside each gate denote the fractions of CD138<sup>hi</sup> splenic plasma cells in mice of the indicated genotypes. (A,B, bottom) Summary of the frequencies of plasma cells. Each symbol represents a mouse. Data are shown as mean  $\pm$  standard deviation. Statistical significance was determined by Student's *t* test (\*,  $P < 0.05$ ). eGFP identifies *relb/nfkb2*-deleted plasma cells within the indicated genotypes.

**Figure S8. Normal splenic and bone marrow plasma cell frequencies following GC B cell-specific deletion of *nfkb2* at day 28 postimmunization.** *nfkb2*<sup>fl/fl</sup>Cy1-Cre mice and the corresponding heterozygous and Cy1-Cre control mice were analyzed via flow cytometry 28

days following immunization with (A) NP-KLH and (B) sheep red blood cells (SRBCs) for CD138 and eGFP expression of splenocytes. Numbers beside each gate denote the fractions of CD138<sup>hi</sup> splenic plasma cells in mice of the indicated genotypes. (A,B, bottom) Summary of the frequencies of plasma cells. Each symbol represents a mouse. Data are shown as mean ± standard deviation. Statistical significance was determined by Student's *t* test (\*, *P*<0.05). eGFP identifies *relb/nfkb2*-deleted plasma cells within the indicated genotypes.

## References

(1) Cato, M.H., Chintalapati, S.K., Yau, I.W., Omori, S.A. & Rickert, R.C. Cyclin D3 is selectively required for proliferative expansion of germinal center B cells. *Mol Cell Biol* **31**:127, 2011.

| <b>Application</b>                                    | <b>Antibody</b>                                    | <b>Manufacturer</b>                   |
|-------------------------------------------------------|----------------------------------------------------|---------------------------------------|
| <b>Immunoblotting</b>                                 | rabbit anti-RELB (clone C-19)                      | Santa Cruz Biotechnology              |
|                                                       | rabbit anti-BCL6 (clone N-3)                       | Santa Cruz Biotechnology              |
|                                                       | rabbit anti-RELA (clone C-20)                      | Santa Cruz Biotechnology              |
|                                                       | rabbit anti-c-REL (clone C)                        | Santa Cruz Biotechnology              |
|                                                       | rabbit anti-p100/p52                               | Cell Signaling Technologies (CST)     |
|                                                       | rabbit anti-p105/p50                               | Cell Signaling Technologies (CST)     |
|                                                       | mouse anti- $\beta$ -actin (clone AC-15)           | Sigma                                 |
|                                                       | anti-rabbit IgG                                    | GE Healthcare                         |
|                                                       | anti-mouse IgG                                     | Thermo Scientific                     |
| <b>Flow cytometry</b>                                 | PerCP-conjugated anti-B220 (clone RA3-6B2)         | Biolegend                             |
|                                                       | Alexa Fluor 700-conjugated anti-CD38 (clone 90)    | eBioscience                           |
|                                                       | PE-conjugated anti-CD138 (clone 281-2)             | BD Pharmingen                         |
|                                                       | APC-conjugated anti-CD86 (clone GL1)               | eBioscience                           |
|                                                       | PE-conjugated anti-CD95 (clone Jo2)                | BD Pharmingen                         |
|                                                       | PerCP-eFluor710-conjugated anti-CXCR4 (clone 2B11) | eBioscience                           |
|                                                       | biotin-conjugated anti-PNA                         | Vector Laboratories                   |
|                                                       | streptavidin-APC                                   | BD Pharmingen                         |
|                                                       | APC-conjugated anti-CD36 (clone HM36)              | Biolegend                             |
|                                                       | PE-CF594-conjugated anti-CD19 (clone 1D3)          | BD Horizon                            |
|                                                       | eFluor® 660-conjugated anti-CD275 (clone HK5.3)    | eBioscience                           |
|                                                       | <b>Immunohistochemistry</b>                        | anti-BCL6 rabbit antibody (clone N-3) |
| alkaline peroxidase (AP)-conjugated anti-IgM antibody |                                                    | Southern Biotech                      |
| <b>Immunofluorescence</b>                             | rabbit anti-p100/p52                               | Cell Signaling Technologies (CST)     |
|                                                       | rabbit anti-p105/p50                               | Cell Signaling Technologies (CST)     |
|                                                       | Cy3-conjugated AffiniPure Donkey anti-rabbit IgG   | Jackson Immuno-Research Laboratories  |
|                                                       | rat anti-BLIMP1(clone 6D3)                         | Santa Cruz Biotechnology              |
|                                                       | goat anti-IRF4 (clone M17)                         | Santa Cruz Biotechnology              |
|                                                       | mouse anti-CD20 (clone Ab-1)                       | NeoMarkers                            |
|                                                       | rabbit anti-c-REL (clone C)                        | Santa Cruz Biotechnology              |
|                                                       | FITC-conjugated goat anti-rat IgG                  | Jackson Immuno-Research Laboratories  |
|                                                       | Cy3-conjugated donkey anti-goat IgG                | Jackson Immunoresearch Laboratories   |
|                                                       | horse anti-mouse-biotin                            | Vector Laboratories                   |
|                                                       | Alexa Fluor 350-streptavidin                       | Molecular Probes                      |
|                                                       | Cy3-conjugated donkey anti-rabbit IgG              | Jackson                               |

**Table S1.** Antibodies used in the experiments.

| <b>DATASET 1</b>                                                                                                                                                        |                   |                    |                |
|-------------------------------------------------------------------------------------------------------------------------------------------------------------------------|-------------------|--------------------|----------------|
| <b>Differentially expressed sequence analysis (DE-SEQ) of RELB/NF-κB2-proficient vs. RELB/NF-κB2-deficient germinal center (GC) B cells at day 7 of the GC reaction</b> |                   |                    |                |
| <b>Reduced expression in <i>relb/nfkb2</i>-deleted GC B cells</b>                                                                                                       |                   |                    |                |
| <b>p&lt;0.01</b>                                                                                                                                                        |                   |                    |                |
| <b>FUNCTIONAL CATEGORY</b>                                                                                                                                              | <b>TRANSCRIPT</b> | <b>FOLD CHANGE</b> | <b>p value</b> |
| <b>APOPTOSIS</b>                                                                                                                                                        | 4632434l11Rik     | 1.76573532         | 0.004915069    |
| <b>CYTOSKELETON</b>                                                                                                                                                     | Kif20b            | 1.811794953        | 0.000943751    |
|                                                                                                                                                                         | Cep290            | 3.701368327        | 0.001250872    |
|                                                                                                                                                                         | Fmn1              | 6.77867816         | 0.002083243    |
|                                                                                                                                                                         | Nebi              | 3.408183756        | 0.002700872    |
|                                                                                                                                                                         | Cenpe             | 1.861234042        | 0.0036804      |
|                                                                                                                                                                         | Pacsin1           | 1.875424826        | 0.0037934      |
|                                                                                                                                                                         | Cenpf             | 2.162703888        | 0.004783279    |
|                                                                                                                                                                         | Lrrcc1            | 1.816466584        | 0.006774469    |
|                                                                                                                                                                         | Smc4              | 1.616979321        | 0.008196885    |
|                                                                                                                                                                         | Rilpl2            | 2.213476746        | 0.000904684    |
|                                                                                                                                                                         | St14              | 2.286564401        | 0.001286364    |
|                                                                                                                                                                         | Pls3              | 3.639672747        | 0.009879553    |
|                                                                                                                                                                         | Cdc42ep4          | 9.822813676        | 0.0005552      |
| <b>IMMUNE RESPONSE</b>                                                                                                                                                  | Ltb               | 2.14762194         | 0.001268232    |
|                                                                                                                                                                         | Nlr1              | 2.046350103        | 0.000920542    |
|                                                                                                                                                                         | Oasl2             | 3.56672381         | 0.00213694     |
|                                                                                                                                                                         | Ifit1             | 3.538140389        | 0.009510845    |
|                                                                                                                                                                         | Ifi27             | 1.745879082        | 0.005145702    |
|                                                                                                                                                                         | Ephb2             | 10.74595395        | 0.000774539    |
|                                                                                                                                                                         | Ptpn1             | 1.548861829        | 0.005691496    |
|                                                                                                                                                                         | Igkv1-135         | 2.012156108        | 0.000889688    |
|                                                                                                                                                                         | Ighg3             | 2.1821529          | 0.002865123    |
|                                                                                                                                                                         | Ighg2c            | 8.537256103        | 0.004010517    |
|                                                                                                                                                                         | Igkv3-2           | 1.940536447        | 0.004639351    |
|                                                                                                                                                                         | Igkv6-25          | 1.692218016        | 0.006119665    |
|                                                                                                                                                                         | Iglv1             | 1.484739556        | 0.007331529    |
|                                                                                                                                                                         | Igkv3-4           | 2.442680718        | 0.008135836    |
|                                                                                                                                                                         | Tlr3              | 3.442985706        | 0.001035165    |
|                                                                                                                                                                         | Tox               | 2.496995356        | 0.00077797     |
|                                                                                                                                                                         | Lck               | 1.962368294        | 9.93E-05       |
|                                                                                                                                                                         | Cxcl10            | 4.015628084        | 0.00643676     |
|                                                                                                                                                                         | Rgs3              | 2.885035238        | 0.009433817    |
|                                                                                                                                                                         | Rgs13             | 3.184725593        | 1.44E-06       |
| <b>METABOLISM</b>                                                                                                                                                       | Aldh2             | 1.64733719         | 0.003367119    |
|                                                                                                                                                                         | Gstt1             | 8.83364123         | 1.77E-05       |
|                                                                                                                                                                         | Gstt3             | 3.001044657        | 0.000196394    |
|                                                                                                                                                                         | Got1              | 1.704525596        | 0.000942447    |
|                                                                                                                                                                         | Slc43a1           | 2.462379625        | 0.002191476    |

|                          |          |             |             |
|--------------------------|----------|-------------|-------------|
|                          | Padi4    | 3.956754531 | 0.009296115 |
|                          | Xpnpep1  | 1.557546587 | 0.009497651 |
|                          | Wbscr17  | 20.48998638 | 0.00060861  |
|                          | St8sia4  | 1.791879207 | 0.004161956 |
|                          | Chst1    | 6.041301989 | 0.004207427 |
|                          | Chst10   | 2.414915656 | 0.007955842 |
|                          | Mocos    | 5.674386583 | 0.005944022 |
|                          | As3mt    | 2.643569946 | 1.58E-06    |
|                          | Pctp     | 2.491318094 | 0.002406578 |
|                          | Osbpl3   | 2.551941535 | 0.003505027 |
|                          | Cers6    | 2.567999041 | 0.001065751 |
|                          | Slc27a4  | 2.652195026 | 0.004516612 |
|                          | Atp10a   | 1.886788035 | 0.006078148 |
|                          | Cpt2     | 1.825272047 | 0.009720877 |
|                          | Cd36     | 3.252357531 | 3.74E-10    |
|                          | Sdhd     | 1.629279505 | 0.006638898 |
|                          | Ndufs6   | 1.754927683 | 0.008735515 |
| <b>OTHER</b>             | Olfr1444 | 8.242565212 | 0.002878901 |
|                          | Nrep     | 11.9868501  | 0.003761633 |
|                          | Ap5b1    | 1.857607311 | 0.005783731 |
|                          | Tor4a    | 1.589572866 | 0.005856674 |
|                          | Syngn2   | 1.634926813 | 0.007306999 |
|                          | Mea1     | 1.765582591 | 0.007840597 |
|                          | Trp73    | 5.053304329 | 0.009116683 |
|                          | Adam15   | 5.588725201 | 0.009544978 |
|                          | Pdia4    | 1.68712728  | 0.00097079  |
|                          | Hps6     | 2.547747033 | 0.005642318 |
|                          | Arid5a   | 2.147512473 | 0.006810885 |
|                          | Commd4   | 1.518135904 | 0.008672118 |
|                          | Stx11    | 3.230499654 | 0.007398995 |
|                          | Anxa4    | 2.056819276 | 0.007722892 |
|                          | Kcnk5    | 1.6499379   | 0.00728454  |
|                          | Enpp4    | 8.546181084 | 7.78E-06    |
| <b>POSTTRANSLATIONAL</b> | Neur1a   | 19.24256824 | 2.73E-06    |
|                          | Ube2j1   | 1.631087569 | 0.006399689 |
|                          | Cops2    | 1.658960528 | 0.002367574 |
|                          | Dtx1     | 1.487093742 | 0.007778813 |
| <b>PROLIFERATION</b>     | Cdk5rap3 | 2.152512764 | 0.005308663 |
|                          | Cdk14    | 2.469387427 | 0.000235753 |
| <b>RNA</b>               | Esf1     | 1.799916698 | 0.006586022 |
|                          | Ssb      | 1.518742324 | 0.008669204 |
|                          | Tceb2    | 1.880320335 | 0.001757054 |
|                          | Gemin7   | 2.699870842 | 0.000506399 |
| <b>SIGNALLING</b>        | Rhobtb1  | 4.174352932 | 0.004952224 |
|                          | Akt2     | 1.516925061 | 0.008288085 |
|                          | Ptpn14   | 2.866098295 | 0.005009919 |
|                          | Dusp6    | 1.60799308  | 0.006220875 |



|                           |               |             |             |
|---------------------------|---------------|-------------|-------------|
|                           | Ptpn13        | 7.525755869 | 0.001412894 |
|                           | Maged1        | 1.925570109 | 0.001430889 |
|                           | Ppm1f         | 1.784373519 | 0.001839516 |
|                           | Evc           | 4.966383366 | 0.000100413 |
|                           | Wls           | 4.286310822 | 0.000270604 |
|                           | Cby1          | 1.7706718   | 0.008709796 |
|                           | Daam1         | 3.173809654 | 0.001281587 |
| <b>TRANSCRIPTION</b>      | Hoxa7         | 28.03543672 | 0.000109421 |
|                           | Tox2          | 10.1999987  | 0.000144835 |
|                           | Phf11b        | 1.648989571 | 0.003212602 |
|                           | Zfp518a       | 1.978975539 | 0.004631411 |
|                           | Zfp52         | 1.617881222 | 0.005142449 |
|                           | Hmga1-rs1     | 7.134385975 | 0.005625708 |
|                           | Zfp365        | 2.695290407 | 0.006027941 |
|                           | Dnttip2       | 1.497356727 | 0.009167669 |
|                           | Hic1          | 6.826539202 | 0.002277476 |
|                           | Nab2          | 2.021091041 | 0.000832352 |
| <b>TRANSPORT</b>          | Pttg1ip       | 1.565319574 | 0.009825817 |
| <b>NON-PROTEIN CODING</b> | Gm14963       | 27.12136716 | 0.000116433 |
|                           | Rps10-ps2     | 1.610920132 | 0.009153303 |
|                           | Gm12063       | 7.718110564 | 0.003664288 |
| <b>UNKNOWN</b>            | Gm10800       | 59.2378127  | 1.36E-08    |
|                           | Gm21738       | 17.17454777 | 6.78E-07    |
|                           | Gm10801       | 24.19518446 | 3.49E-05    |
|                           | A930033H14Rik | 13.3365832  | 0.000117682 |
|                           | Gm10717       | 18.58433817 | 0.000145953 |
|                           | Zfp51         | 2.030754582 | 0.000279444 |
|                           | Sh3bgrl       | 2.647161401 | 0.000293758 |
|                           | R3hdm4        | 1.634308691 | 0.000609235 |
|                           | Ccdc120       | 5.445959362 | 0.00172023  |
|                           | Fam167a       | 1.801532248 | 0.003004706 |
|                           | Endod1        | 1.787831291 | 0.004318015 |
|                           | Ldoc1l        | 1.755128906 | 0.004832892 |
|                           | Fam135a       | 6.437804933 | 0.005610792 |
|                           | 7-Sep         | 1.545761942 | 0.006904712 |
|                           | Gm9825        | 2.794255416 | 0.006924743 |
|                           | Paqr7         | 6.794428153 | 0.007168583 |
|                           | 4930506M07Rik | 3.870257186 | 0.007304508 |
| <b>N/A</b>                | Relb          | 3.872632342 | 0.001113217 |
|                           | Nfkb2         | 2.93907889  | 0.001172224 |

| <b>DATASET 2</b>                                                                                                                                                        |                   |                    |                |
|-------------------------------------------------------------------------------------------------------------------------------------------------------------------------|-------------------|--------------------|----------------|
| <b>Differentially expressed sequence analysis (DE-SEQ) of RELB/NF-κB2-proficient vs. RELB/NF-κB2-deficient germinal center (GC) B cells at day 7 of the GC reaction</b> |                   |                    |                |
| <b>Increased expression in <i>relb/nfkb2</i>-deleted GC B cells</b>                                                                                                     |                   |                    |                |
| <b>p&lt;0.01</b>                                                                                                                                                        |                   |                    |                |
| <b>FUNCTIONAL CATEGORY</b>                                                                                                                                              | <b>TRANSCRIPT</b> | <b>FOLD CHANGE</b> | <b>p value</b> |
| <b>CYTOSKELETON</b>                                                                                                                                                     | Dnm1              | 28.84816562        | 1.71E-06       |
|                                                                                                                                                                         | Tppp              | 6.031130636        | 0.000340554    |
|                                                                                                                                                                         | Ppp1r12b          | 1.966474662        | 0.001247336    |
|                                                                                                                                                                         | Stard9            | 2.302096874        | 0.002963074    |
|                                                                                                                                                                         | Col27a1           | 3.005588623        | 0.004863368    |
|                                                                                                                                                                         | Ttll3             | 1.789245228        | 0.005750192    |
|                                                                                                                                                                         | Zmym6             | 1.930714227        | 0.001287388    |
|                                                                                                                                                                         | Vezt              | 1.758610136        | 0.001830602    |
|                                                                                                                                                                         | Myl6b             | 2.229711167        | 0.00494586     |
| <b>IMMUNE RESPONSE</b>                                                                                                                                                  | Il18bp            | 2.182066265        | 0.001194784    |
|                                                                                                                                                                         | ligp1             | 8.369047288        | 0.009720592    |
|                                                                                                                                                                         | Bach2             | 1.669056135        | 0.003186453    |
|                                                                                                                                                                         | Fcgr2b            | 1.591884604        | 0.002555638    |
| <b>METABOLISM</b>                                                                                                                                                       | Phykpl            | 1.729897457        | 0.000264972    |
|                                                                                                                                                                         | Slc15a2           | 5.230059989        | 6.09E-08       |
|                                                                                                                                                                         | Slc1a5            | 1.670898557        | 0.003704039    |
|                                                                                                                                                                         | Ogt               | 1.600700579        | 0.009865998    |
|                                                                                                                                                                         | Cp                | 4.031121943        | 0.002349171    |
|                                                                                                                                                                         | Ltf               | 15.26600973        | 0.000597746    |
|                                                                                                                                                                         | Mgll              | 2.645647937        | 0.001999474    |
| <b>NON-PROTEIN CODING</b>                                                                                                                                               | Gm26789           | 5.0514664          | 8.62E-16       |
|                                                                                                                                                                         | Gm26625           | 4.09937526         | 9.00E-10       |
|                                                                                                                                                                         | Gm26749           | 4.178514721        | 3.36E-07       |
|                                                                                                                                                                         | Gm11932           | 3.581939544        | 5.75E-07       |
|                                                                                                                                                                         | Gm17477           | 7.342866239        | 8.25E-07       |
|                                                                                                                                                                         | Gm4279            | 4.806875857        | 9.35E-07       |
|                                                                                                                                                                         | Gm16153           | 2.503956747        | 2.49E-05       |
|                                                                                                                                                                         | Gm11721           | 6.337946518        | 3.94E-05       |
|                                                                                                                                                                         | BC024582          | 2.478009337        | 9.80E-05       |
|                                                                                                                                                                         | Gm26882           | 2.868542527        | 0.000121993    |
|                                                                                                                                                                         | Gm12543           | 3.211250557        | 0.000139233    |
|                                                                                                                                                                         | Gm10552           | 2.182269327        | 0.000171293    |
|                                                                                                                                                                         | Gm26518           | 2.857975964        | 0.00020212     |
|                                                                                                                                                                         | 4632427E13Rik     | 2.209429133        | 0.000207424    |
|                                                                                                                                                                         | Gm16316           | 3.850261574        | 0.000445266    |
|                                                                                                                                                                         | Gm12064           | 2.967931907        | 0.00046968     |
|                                                                                                                                                                         | RP23-308M1.2      | 2.23360891         | 0.000497483    |
|                                                                                                                                                                         | Neat1             | 2.411691808        | 0.00066252     |
|                                                                                                                                                                         | Gm23346           | 3.2731059          | 0.000853068    |

|  |               |             |             |
|--|---------------|-------------|-------------|
|  | DLEU2_1       | 2.533891205 | 0.000893282 |
|  | 2610037D02Rik | 2.293055741 | 0.00090429  |
|  | Gpr137b-ps    | 1.911696372 | 0.000992758 |
|  | Gm17388       | 4.649648388 | 0.001055935 |
|  | Gm13171       | 5.594264975 | 0.001063637 |
|  | Gm13543       | 4.955253692 | 0.001080368 |
|  | Gm15478       | 3.132276391 | 0.001116323 |
|  | Gm15897       | 4.591754099 | 0.001322378 |
|  | Gm20506       | 1.999887405 | 0.001387329 |
|  | Gm26981       | 2.203437115 | 0.001428371 |
|  | Gm17195       | 3.071474284 | 0.001583323 |
|  | Gm12734       | 3.19714221  | 0.001613551 |
|  | Gm17414       | 2.331330014 | 0.001706457 |
|  | Gm11052       | 2.912597908 | 0.001772564 |
|  | Gm15824       | 4.182238288 | 0.001805796 |
|  | Gm26857       | 2.499167522 | 0.001821849 |
|  | RP23-93M1.3   | 2.766231152 | 0.002223009 |
|  | A730011C13Rik | 2.560051398 | 0.002292352 |
|  | Gm15342       | 2.890674769 | 0.00242165  |
|  | Gm15334       | 4.256464348 | 0.002454759 |
|  | Gm26531       | 2.738309967 | 0.002463093 |
|  | Gm26617       | 2.124240023 | 0.002632707 |
|  | Gm26742       | 2.227524548 | 0.002694886 |
|  | Gm15765       | 2.643931266 | 0.002782114 |
|  | 0610039K10Rik | 11.74433708 | 0.002876952 |
|  | Gm15154       | 5.406874136 | 0.002980496 |
|  | Gm14052       | 3.02174149  | 0.0029832   |
|  | Gm20717       | 3.690336855 | 0.003063738 |
|  | 4933426D04Rik | 5.357351955 | 0.003378546 |
|  | Gm16023       | 2.189551554 | 0.003393034 |
|  | RP23-32A8.1   | 2.028176773 | 0.003494639 |
|  | Gm25820       | 6.338011442 | 0.003555737 |
|  | Gm20682       | 3.684991448 | 0.003602044 |
|  | RP23-224I23.1 | 7.417608209 | 0.003806439 |
|  | Gm12940       | 2.411520221 | 0.004024482 |
|  | 1700099I09Rik | 3.275967106 | 0.004075714 |
|  | Gm16305       | 3.307957241 | 0.004241203 |
|  | Gm19980       | 1.799601782 | 0.004747646 |
|  | C030005K06Rik | 2.168010477 | 0.005006014 |
|  | Gm11805       | 2.983369408 | 0.005019858 |
|  | 1700012B15Rik | 1.603357771 | 0.005495435 |
|  | Gm17275       | 2.359980233 | 0.005505916 |
|  | Gm22304       | 4.347490289 | 0.006110111 |
|  | Gm25848       | 2.569071108 | 0.006148293 |
|  | Gm13510       | 3.983865544 | 0.006522137 |

|                          |               |             |             |
|--------------------------|---------------|-------------|-------------|
|                          | Rpl31-ps6     | 4.09498902  | 0.007240531 |
|                          | Gm14335       | 2.63348781  | 0.007470624 |
|                          | 4933426K07Rik | 2.524163198 | 0.007472611 |
|                          | E130307A14Rik | 1.993156616 | 0.007532921 |
|                          | Gm13571       | 3.331657237 | 0.007629546 |
|                          | Gm16091       | 2.159857865 | 0.007889815 |
|                          | Gm13570       | 3.54909018  | 0.007968129 |
|                          | Gm14853       | 4.61051573  | 0.007981705 |
|                          | Mir5120       | 2.856865965 | 0.008087406 |
|                          | Gm26836       | 2.592935332 | 0.008418244 |
|                          | Gm26530       | 2.401683645 | 0.008714043 |
|                          | Gm11655       | 4.266930256 | 0.008922059 |
|                          | 4930565N06Rik | 2.591519262 | 0.009337    |
|                          | Gm15367       | 6.818256329 | 0.009380237 |
|                          | Gm27006       | 1.966796151 | 0.009523067 |
| <b>OTHER</b>             | Rnf24         | 2.196605835 | 0.000528498 |
|                          | Angpt2        | 2.900169285 | 0.001541543 |
|                          | BC005764      | 1.919530755 | 0.001673873 |
|                          | Lrrc18        | 2.729916644 | 0.004545494 |
|                          | Trpc2         | 1.614715894 | 0.006274267 |
|                          | Efcab12       | 5.841862587 | 0.008085481 |
|                          | H2afy3        | 3.412721398 | 0.002619242 |
|                          | Setbp1        | 1.540851613 | 0.009661562 |
|                          | Snap25        | 72.08175121 | 1.51E-07    |
|                          | Sec61a2       | 2.938930987 | 0.001541862 |
|                          | Hps5          | 1.627567475 | 0.002318163 |
|                          | Kdelr3        | 5.756452542 | 0.004405829 |
|                          | Sec24a        | 1.738556263 | 0.005698053 |
|                          | Eif2ak4       | 1.640215791 | 0.004828028 |
| <b>POSTTRANSLATIONAL</b> | Fbxo33        | 1.91728896  | 0.000594532 |
|                          | Trim2         | 2.819847322 | 0.001544851 |
|                          | Usp31         | 1.834172757 | 0.005403484 |
| <b>PROLIFERATION</b>     | Ccnt2         | 1.798147479 | 0.00326556  |
|                          | Ccn1          | 1.723670074 | 0.006301363 |
| <b>RNA</b>               | Rbm4          | 2.330635342 | 0.002311844 |
|                          | Tnrc6c        | 1.652502454 | 0.001061403 |
| <b>SIGNALLING</b>        | Mtcp1         | 2.234393199 | 0.0001191   |
|                          | Gnas          | 2.125295649 | 0.001903867 |
|                          | Synj1         | 1.685791402 | 0.002918681 |
|                          | Camk2n1       | 8.271429708 | 0.003738905 |
|                          | Prex1         | 1.941485094 | 0.004172067 |
|                          | Supt20        | 1.647597095 | 0.007076665 |
|                          | Pkig          | 2.299860242 | 0.007840116 |
|                          | Arhgap33      | 1.98592123  | 0.008402208 |
|                          | Ppm1e         | 1.852192892 | 0.008754716 |
|                          | Pla2g4c       | 2.933583458 | 0.008957931 |
|                          | Clk4          | 1.67897501  | 0.000266637 |

|                      |               |             |             |
|----------------------|---------------|-------------|-------------|
|                      | Appl2         | 2.001457941 | 0.005897816 |
|                      | Lgr5          | 1.749665936 | 0.001810133 |
| <b>TRANSCRIPTION</b> | Zfp142        | 1.735643654 | 0.000213949 |
|                      | Gcfc2         | 1.849356289 | 0.000342988 |
|                      | Zkscan3       | 1.967805562 | 0.000917747 |
|                      | Adnp          | 3.308903224 | 0.002100786 |
|                      | Aff4          | 1.57044068  | 0.003686946 |
|                      | Baz2b         | 1.581081508 | 0.004676425 |
|                      | Zbed6         | 1.754047601 | 0.006455156 |
|                      | Kmt2a         | 1.777490563 | 0.000153691 |
|                      | Ep300         | 1.617435479 | 0.000495934 |
|                      | Mettl8        | 1.890539374 | 0.001209602 |
|                      | Kmt2c         | 1.902861322 | 0.006733584 |
|                      | Brwd1         | 1.712937581 | 0.009509292 |
|                      | Taf5          | 1.753590873 | 0.009647337 |
| <b>TRANSPORT</b>     | Scn8a         | 2.985559464 | 0.001391662 |
|                      | Atp1a3        | 8.434327762 | 0.001444815 |
|                      | Slc22a23      | 4.575176512 | 0.00433535  |
|                      | Slco4a1       | 2.310672332 | 0.009700075 |
| <b>UNKNOWN</b>       | 4933408B17Rik | 5.410317807 | 0.000242984 |
|                      | D130062J21Rik | 2.427757354 | 0.00025754  |
|                      | Armc9         | 2.149501998 | 0.000425168 |
|                      | Ddx26b        | 1.762250417 | 0.000529779 |
|                      | Gm6104        | 3.31093544  | 0.000559432 |
|                      | 2610203C22Rik | 6.299653481 | 0.000815857 |
|                      | A630001G21Rik | 1.564847945 | 0.00257137  |
|                      | Xkr6          | 5.22397547  | 0.002744925 |
|                      | Fam196b       | 2.514140993 | 0.004613704 |
|                      | Gm17227       | 5.075807117 | 0.005449014 |
|                      | Samd15        | 2.395885905 | 0.005787071 |
|                      | Tanc2         | 2.119361771 | 0.005834643 |
|                      | Gm9754        | 7.642938157 | 0.006785963 |
|                      | Gpr137c       | 2.393937261 | 0.007520939 |

| <b>DATASET 3</b>                                                                                                                                                          |                 |            |                  |                  |
|---------------------------------------------------------------------------------------------------------------------------------------------------------------------------|-----------------|------------|------------------|------------------|
| <b>GSEA was used to identify gene signatures that were enriched in GC B cells from Cy1-Cre vs. <i>relb</i><sup>fl/fl</sup> <i>nfkB2</i><sup>fl/fl</sup> Cy1-Cre mice.</b> |                 |            |                  |                  |
| <b>GENE SET</b>                                                                                                                                                           | <b>FUNCTION</b> | <b>NES</b> | <b>NOM p-val</b> | <b>FDR q-val</b> |
| REACTOME_INFLUENZA_VIRAL_RNA_TRANSCRIPTION_AND_REPLICATION                                                                                                                | CELL CYCLE      | 1.811999   | 0                | 0.101812         |
| REACTOME_AUTODEGRADATION_OF_CDH1_BY_CDH1_APC_C                                                                                                                            | CELL CYCLE      | 1.643409   | 0.002915         | 0.136935         |
| REACTOME_APC_C_CDH1_MEDIATED_DEGRADATION_OF_CDC20_AND_OTHER_APC_C_CDH1_TARGETED_PROTEINS_IN_LATE_MITOSIS_EARLY_G1                                                         | CELL CYCLE      | 1.610237   | 0.002849         | 0.161222         |
| REACTOME_SCFSKP2_MEDIATED_DEGRADATION_OF_P27_P21                                                                                                                          | CELL CYCLE      | 1.55941    | 0.005525         | 0.16866          |
| REACTOME_CHROMOSOME_MAINTENANCE                                                                                                                                           | CELL CYCLE      | 1.591701   | 0                | 0.168939         |
| REACTOME_CDK_MEDIATED_PHOSPHORYLATION_AND_REMOVAL_OF_CDC6                                                                                                                 | CELL CYCLE      | 1.572742   | 0.008876         | 0.16928          |
| REACTOME_S_PHASE                                                                                                                                                          | CELL CYCLE      | 1.553594   | 0                | 0.172814         |
| REACTOME_P53_INDEPENDENT_G1_S_DNA_DAMAGE_CHECKPOINT                                                                                                                       | CELL CYCLE      | 1.540152   | 0.009091         | 0.17295          |
| REACTOME_CYCLIN_E_ASSOCIATED_EVENTS_DURING_G1_S_TRANSITION                                                                                                                | CELL CYCLE      | 1.549326   | 0.003226         | 0.174812         |
| REACTOME_DEPOSITION_OF_NEW_CENPA_CONTAINING_NUCLEOSOMES_AT_THE_CENTROMERE                                                                                                 | CELL CYCLE      | 1.528166   | 0.015015         | 0.176994         |
| REACTOME_ORC1_REMOVAL_FROM_CHROMATIN                                                                                                                                      | CELL CYCLE      | 1.534084   | 0.006173         | 0.177012         |
| REACTOME_PACKAGING_OF_TELOMERE_ENDS                                                                                                                                       | CELL CYCLE      | 1.531013   | 0.029101         | 0.177025         |
| REACTOME_ASSEMBLY_OF_THE_PRE_REPLICATIVE_COMPLEX                                                                                                                          | CELL CYCLE      | 1.493999   | 0.002994         | 0.178501         |
| REACTOME_MITOTIC_G1_G1_S_PHASES                                                                                                                                           | CELL CYCLE      | 1.483746   | 0.013043         | 0.179217         |
| REACTOME_PROCESSIVE_SYNTHESIS_ON_THE_LAGGING_STRAND                                                                                                                       | CELL CYCLE      | 1.500619   | 0.032864         | 0.179549         |
| REACTOME_CELL_CYCLE                                                                                                                                                       | CELL CYCLE      | 1.491346   | 0                | 0.179684         |
| REACTOME_SYNTHESIS_OF_DNA                                                                                                                                                 | CELL CYCLE      | 1.574351   | 0.00678          | 0.179956         |
| REACTOME_AUTODEGRADATION_OF_THE_E3_UBIQUITIN_LIGASE_COP1                                                                                                                  | CELL CYCLE      | 1.522853   | 0                | 0.18023          |
| REACTOME_SCF_BETA_TRCP_MEDIATED_DEGRADATION_OF_EMI1                                                                                                                       | CELL CYCLE      | 1.478241   | 0.026549         | 0.180952         |
| REACTOME_G1_S_TRANSITION                                                                                                                                                  | CELL CYCLE      | 1.49711    | 0                | 0.181338         |
| REACTOME_CDT1_ASSOCIATION_WITH_THE_CDC6_ORC_ORIGIN_COMPLEX                                                                                                                | CELL CYCLE      | 1.473252   | 0.014925         | 0.184316         |

|                                                                                                                                |                        |          |          |          |
|--------------------------------------------------------------------------------------------------------------------------------|------------------------|----------|----------|----------|
| REACTOME_MEIOTIC_SYNAPSIS                                                                                                      | CELL CYCLE             | 1.46446  | 0.015244 | 0.19005  |
| REACTOME_P53_DEPENDENT_G1_DNA_DAMAGE_RESPONSE                                                                                  | CELL CYCLE             | 1.450591 | 0.01847  | 0.191076 |
| REACTOME_DNA_STRAND_ELONGATION                                                                                                 | CELL CYCLE             | 1.442521 | 0.04607  | 0.199118 |
| REACTOME_CELL_CYCLE_MITOTIC                                                                                                    | CELL CYCLE             | 1.415716 | 0        | 0.220079 |
| REACTOME_DNA_REPLICATION                                                                                                       | CELL CYCLE             | 1.416041 | 0        | 0.222733 |
| REACTOME_M_G1_TRANSITION                                                                                                       | CELL CYCLE             | 1.419341 | 0.019293 | 0.224022 |
| REACTOME_REGULATION_OF_MITOTIC_CELL_CYCLE                                                                                      | CELL CYCLE             | 1.416288 | 0.021127 | 0.225492 |
| REACTOME_TELOMERE_MAINTENANCE                                                                                                  | CELL CYCLE             | 1.724348 | 0.002933 | 0.08386  |
| REACTOME_APC_C_CDC20_MEDIATED_DEGRADATION_OF_MITOTIC_PROTEINS                                                                  | CELL CYCLE             | 1.593561 | 0        | 0.173014 |
| REACTOME_EXTENSION_OF_TELOMERES                                                                                                | CELL CYCLE             | 1.488889 | 0.036585 | 0.179661 |
| REACTOME_TRANSLATION                                                                                                           | METABOLISM OF PROTEINS | 1.880179 | 0        | 0.046584 |
| REACTOME_3_UTR_MEDIATED_TRANSLATIONAL_REGULATION                                                                               | METABOLISM OF PROTEINS | 1.811877 | 0        | 0.067875 |
| REACTOME_PEPTIDE_CHAIN_ELONGATION                                                                                              | METABOLISM OF PROTEINS | 1.742802 | 0        | 0.085568 |
| REACTOME_SRP_DEPENDENT_COTRANSLATIONAL_PROTEIN_TARGETING_TO_MEMBRAN<br>E                                                       | METABOLISM OF PROTEINS | 1.72942  | 0        | 0.089227 |
| REACTOME_CYTOSOLIC_TRNA_AMINOACYLATION                                                                                         | METABOLISM OF PROTEINS | 1.693283 | 0.004926 | 0.10097  |
| REACTOME_FORMATION_OF_THE_TERNARY_COMPLEX_AND_SUBSEQUENTLY_THE_43S_<br>COMPLEX                                                 | METABOLISM OF PROTEINS | 1.74659  | 0.005222 | 0.112031 |
| REACTOME_ACTIVATION_OF_THE_MRNA_UPON_BINDING_OF_THE_CAP_BINDING_COM<br>PLEX_AND_EIFS_AND_SUBSEQUENT_BINDING_TO_43S             | METABOLISM OF PROTEINS | 1.747    | 0        | 0.139006 |
| REACTOME_METABOLISM_OF_PROTEINS                                                                                                | METABOLISM OF PROTEINS | 1.521416 | 0        | 0.177564 |
| REACTOME_MITOCHONDRIAL_PROTEIN_IMPORT                                                                                          | METABOLISM OF PROTEINS | 1.505901 | 0.011396 | 0.187969 |
| REACTOME_AMYLOIDS                                                                                                              | METABOLISM OF PROTEINS | 1.424508 | 0.010453 | 0.219171 |
| REACTOME_TRNA_AMINOACYLATION                                                                                                   | METABOLISM OF PROTEINS | 1.392996 | 0.030055 | 0.238175 |
| KEGG_RIBOSOME                                                                                                                  | METABOLISM OF PROTEINS | 1.754189 | 0        | 0.13791  |
| KEGG_PROTEASOME                                                                                                                | METABOLISM OF PROTEINS | 1.693096 | 0        | 0.109451 |
| STRUCTURAL_CONSTITUENT_OF_RIBOSOME                                                                                             | METABOLISM OF PROTEINS | 1.725146 | 0        | 0.109363 |
| REACTOME_RESPIRATORY_ELECTRON_TRANSPORT_ATP_SYNTHESIS_BY_CHEMIOSMOTIC<br>_COUPLING_AND_HEAT_PRODUCTION_BY_UNCOUPLING_PROTEINS_ | METABOLISM             | 1.619906 | 0        | 0.153153 |
| REACTOME_TCA_CYCLE_AND_RESPIRATORY_ELECTRON_TRANSPORT                                                                          | METABOLISM             | 1.623287 | 0        | 0.155189 |
| REACTOME_RESPIRATORY_ELECTRON_TRANSPORT                                                                                        | METABOLISM             | 1.560152 | 0.003086 | 0.173101 |
| REACTOME_PYRIMIDINE_METABOLISM                                                                                                 | METABOLISM             | 1.573597 | 0.022059 | 0.174455 |
| REACTOME_CITRIC_ACID_CYCLE_TCA_CYCLE                                                                                           | METABOLISM             | 1.503968 | 0.026829 | 0.182254 |
| REACTOME_REGULATION_OF_ORNITHINE_DECARBOXYLASE_ODC                                                                             | METABOLISM             | 1.413184 | 0.027933 | 0.220742 |

|                                                                        |                     |          |          |          |
|------------------------------------------------------------------------|---------------------|----------|----------|----------|
| REACTOME_DESTABILIZATION_OF_MRNA_BY_AUF1_HNRNP_D0                      | METABOLISM          | 1.399007 | 0.026239 | 0.23185  |
| KEGG_CITRATE_CYCLE_TCA_CYCLE                                           | METABOLISM          | 1.729864 | 0.002618 | 0.10381  |
| KEGG_PYRIMIDINE_METABOLISM                                             | METABOLISM          | 1.614906 | 0.00346  | 0.201364 |
| SULFOTRANSFERASE_ACTIVITY                                              | METABOLISM          | 1.698125 | 0.005168 | 0.118615 |
| TRANSFERASE_ACTIVITY_TRANSFERRING_SULFUR_CONTAINING_GROUPS             | METABOLISM          | 1.660357 | 0        | 0.151372 |
| ELECTRON_CARRIER_ACTIVITY                                              | METABOLISM          | 1.603336 | 0        | 0.239768 |
| REACTOME_RNA_POL_I_PROMOTER_OPENING                                    | GENE EXPRESSION     | 1.746555 | 0        | 0.093359 |
| REACTOME_NONSENSE_MEDIATED_DECAY_ENHANCED_BY_THE_EXON_JUNCTION_COMPLEX | GENE EXPRESSION     | 1.634397 | 0        | 0.142894 |
| REACTOME_ABORTIVE_ELONGATION_OF_HIV1_TRANSCRIPT_IN_THE_ABSENCE_OF_TAT  | GENE EXPRESSION     | 1.563651 | 0.029851 | 0.173377 |
| REACTOME_METABOLISM_OF_MRNA                                            | GENE EXPRESSION     | 1.5039   | 0        | 0.178465 |
| REACTOME_RNA_POL_I_TRANSCRIPTION                                       | GENE EXPRESSION     | 1.48429  | 0.022801 | 0.181888 |
| REACTOME_METABOLISM_OF_RNA                                             | GENE EXPRESSION     | 1.504446 | 0        | 0.185749 |
| REACTOME_FORMATION_OF_RNA_POL_II_ELONGATION_COMPLEX                    | GENE EXPRESSION     | 1.463474 | 0.035616 | 0.188364 |
| REACTOME_MRNA_SPLICING_MINOR_PATHWAY                                   | GENE EXPRESSION     | 1.50774  | 0.00554  | 0.189572 |
| REACTOME_ELONGATION_ARREST_AND_RECOVERY                                | GENE EXPRESSION     | 1.454108 | 0.039702 | 0.191917 |
| REACTOME_VIF_MEDIATED_DEGRADATION_OF_APOBEC3G                          | OTHER               | 1.684134 | 0        | 0.096182 |
| REACTOME_INFLUENZA_LIFE_CYCLE                                          | OTHER               | 1.56953  | 0        | 0.169132 |
| REACTOME_HOST_INTERACTIONS_OF_HIV_FACTORS                              | OTHER               | 1.496161 | 0.00722  | 0.179198 |
| REACTOME_RESPONSE_TO_ELEVATED_PLATELET_CYTOSOLIC_CA2                   | OTHER               | 1.577411 | 0        | 0.181002 |
| REACTOME_HIV_INFECTION                                                 | OTHER               | 1.452097 | 0.009524 | 0.191694 |
| REACTOME_FORMATION_OF_THE_HIV1_EARLY_ELONGATION_COMPLEX                | OTHER               | 1.435967 | 0.040302 | 0.205031 |
| KEGG_SYSTEMIC_LUPUS_ERYTHEMATOSUS                                      | OTHER               | 1.59042  | 0        | 0.212275 |
| REACTOME_CROSS_PRESENTATION_OF_SOLUBLE_EXOGENOUS_ANTIGENS_ENDOSOMES    | IMMUNE SYSTEM       | 1.546908 | 0.008219 | 0.173392 |
| REACTOME_ANTIGEN_PROCESSING_CROSS_PRESENTATION                         | IMMUNE SYSTEM       | 1.540556 | 0.002817 | 0.177592 |
| REACTOME_CLASS_I_MHC_MEDIATED_ANTIGEN_PROCESSING_PRESENTATION          | IMMUNE SYSTEM       | 1.461016 | 0        | 0.188421 |
| REACTOME_ER_PHAGOSOME_PATHWAY                                          | IMMUNE SYSTEM       | 1.508333 | 0.011594 | 0.193269 |
| REACTOME_ANTIGEN_PROCESSING_UBIQUITINATION_PROTEASOME_DEGRADATION      | IMMUNE SYSTEM       | 1.403658 | 0.004739 | 0.229529 |
| REACTOME_INTERFERON_ALPHA_BETA_SIGNALING                               | SIGNAL TRANSDUCTION | 1.698985 | 0.002793 | 0.104335 |
| REACTOME_SIGNALING_BY_WNT                                              | SIGNAL TRANSDUCTION | 1.482521 | 0.006623 | 0.177773 |
| REACTOME_REGULATION_OF_IFNA_SIGNALING                                  | SIGNAL TRANSDUCTION | 1.595888 | 0.016787 | 0.178083 |



|                                              |                       |          |          |          |
|----------------------------------------------|-----------------------|----------|----------|----------|
| REACTOME_PKB_MEDIATED_EVENTS                 | SIGNAL TRANSDUCTION   | 1.456919 | 0.037736 | 0.191353 |
| REACTOME_REGULATION_OF_APOPTOSIS             | PROGRAMMED CELL DEATH | 1.688258 | 0        | 0.099712 |
| REACTOME_APOPTOSIS                           | PROGRAMMED CELL DEATH | 1.591388 | 0        | 0.162688 |
| REACTOME_APOPTOTIC_EXECUTION_PHASE           | PROGRAMMED CELL DEATH | 1.472708 | 0.017143 | 0.181795 |
| REACTOME_CHEMOKINE_RECEPTORS_BIND_CHEMOKINES | TRAFFICKING           | 1.679678 | 0.002786 | 0.092972 |
| CHEMOKINE_RECEPTOR_BINDING                   | TRAFFICKING           | 1.800605 | 0        | 0.047045 |
| CHEMOKINE_ACTIVITY                           | TRAFFICKING           | 1.81638  | 0.002577 | 0.07279  |
